# Supplementary material
Source: MDPI journal article supplement (https://www.mdpi.com/2218-6581/11/5/106)
Supplement: s1 [file s1]

Archive with 11 entries (11 files):
- failure justification_human-like1.mp3
- failure justification_human-like2.mp3
- failure justification_technical1.mp3
- failure justification_technical2.mp3
- Questionnaires.pdf
- request_louder.wav
- request_more clearly.wav
- request_repeat.wav
- request_rephrase.wav
- request_slower.wav
- Script_failure justification.pdf
